# Supplementary material for: Comparison of the Phytochemical Variation of Non-Volatile Metabolites within Mother Tinctures of Arnica montana Prepared from Fresh and Dried Whole Plant Using UHPLC-HRMS Fingerprinting and Chemometric Analysis
Source: MDPI journal article supplement (doi:10.3390/molecules27092737), 2022-04-24
Supplement: s1 [file s1]

## Supplementary Materials

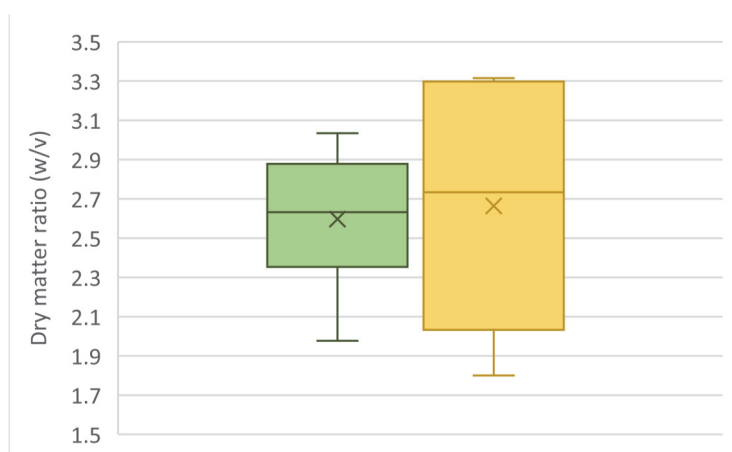

**Figure S1.** Mean dry residues ratio (in mg.mL<sup>-1</sup>) obtained from mother tinctures. fMT: green box (n=12) and yellow box for dMT (n=12).

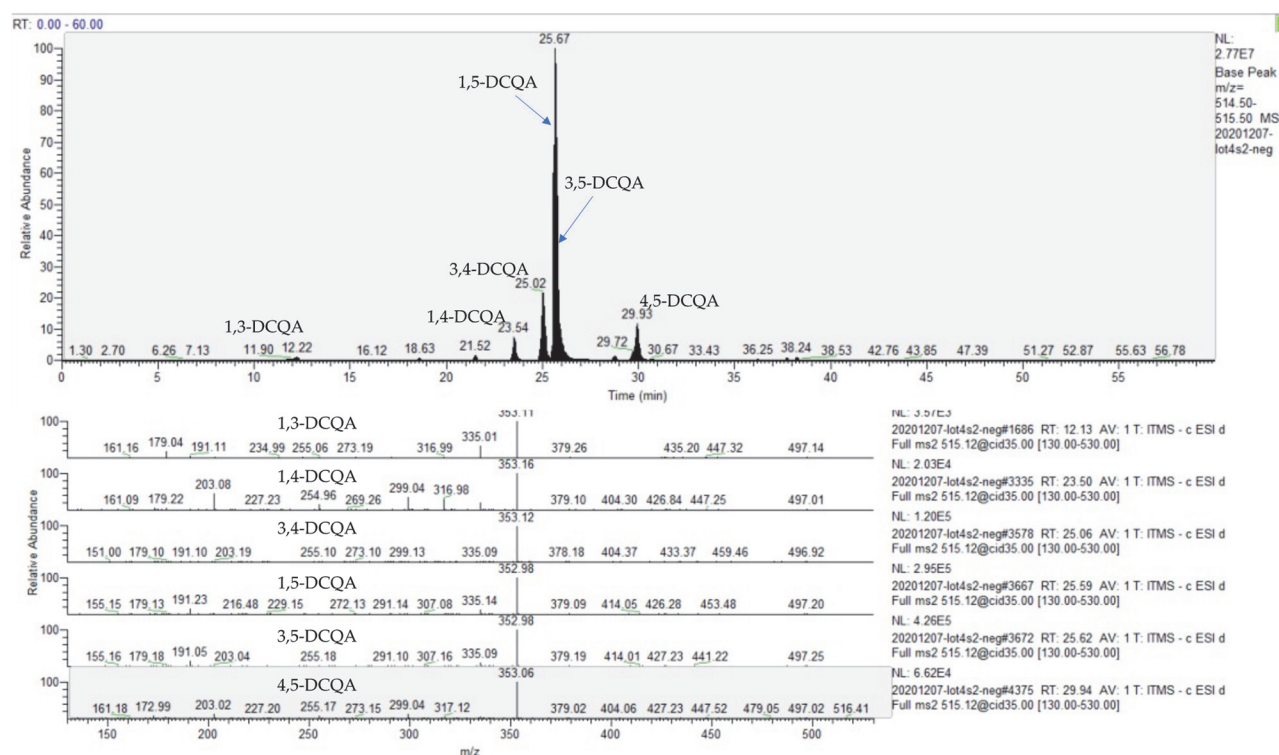

**Figure S2.** Selected ion chromatogram (m/z 515 (-)ESI) of fMT and MS/MS spectra of the 6 isomers of DCQA (m/z 515) showing differences in relative intensities of some product ions. The 1,5- and 3,5-DCQA are co-eluted at Tr 25.6 min.

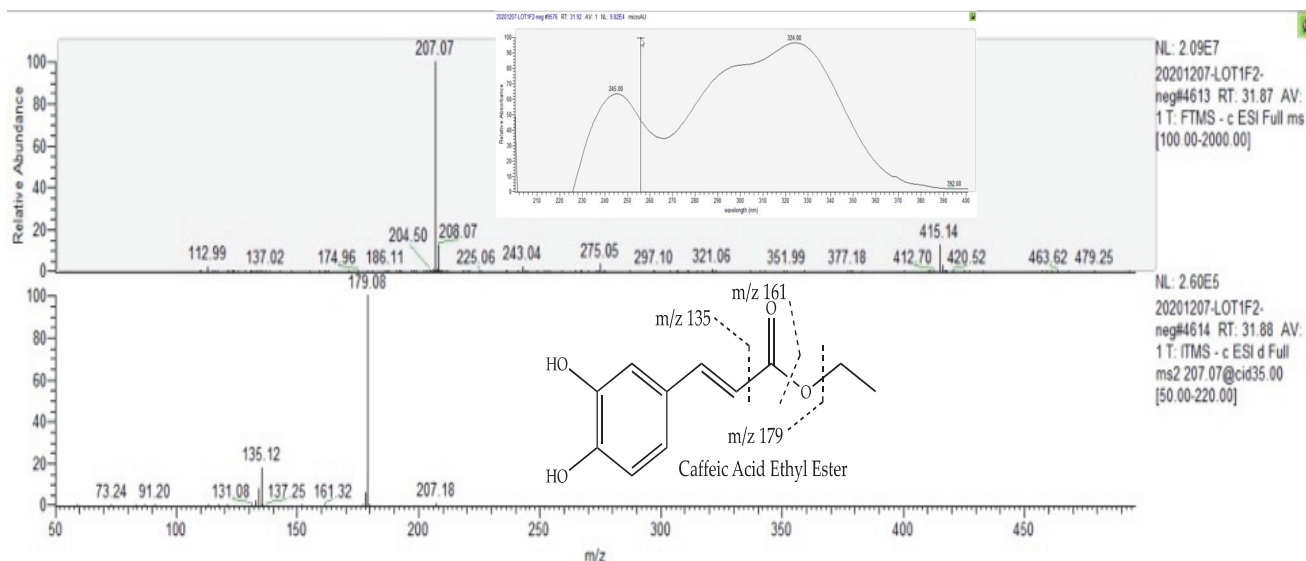

**Figure S3.** UV and negative ion ESI full MS spectra of the peak at 32.8 min (fMT) and MS/MS of the  $m/z$  207 ion in coherence with the structure of Ethyl Caffeate as shown by the proposed structures of fragments.

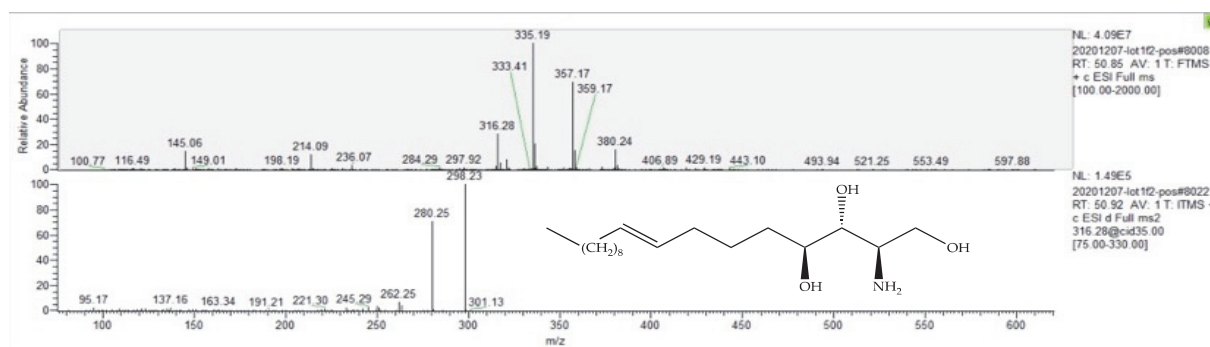

**Figure S4.** Full positive ion ESI MS spectrum of Rt 50.8 min peak and MS/MS spectrum of  $m/z$  316 ion corresponding to Trihydroxysphingene and showing the three successive losses of  $H_2O$ .

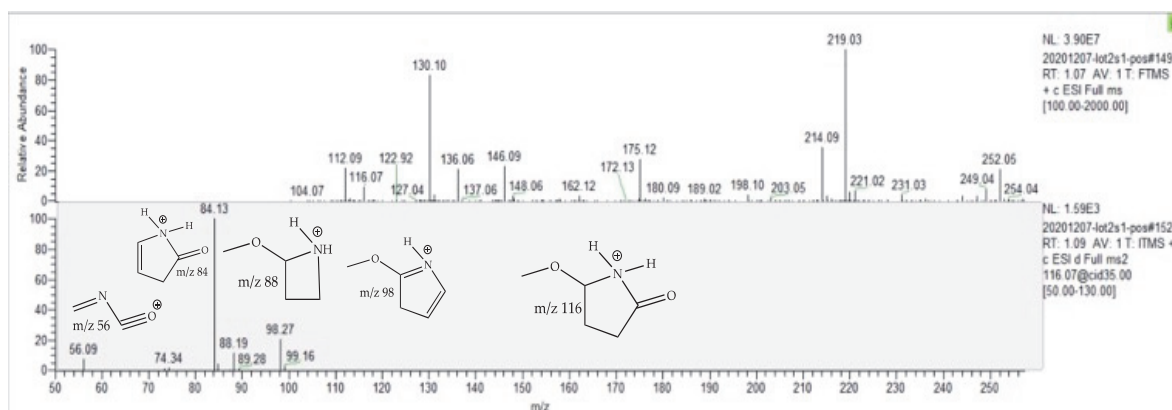

**Figure S5.** Full positive ion ESI MS spectrum of Rt 1.09 min peak and MS/MS spectrum of  $m/z$  116 ion annotated to a pyrrolidinone Me ether derivative (with proposed structures for fragments).

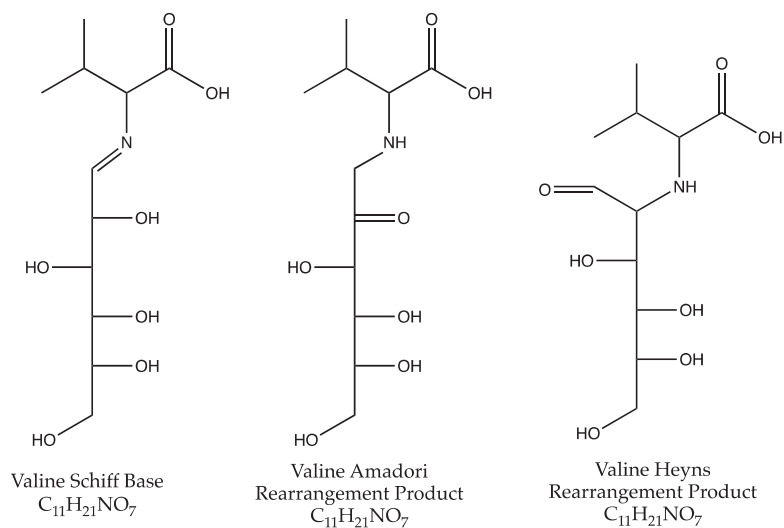

**Figure S6.** Structures of Valine Schiff base, Amadori and Heyns rearrangement products

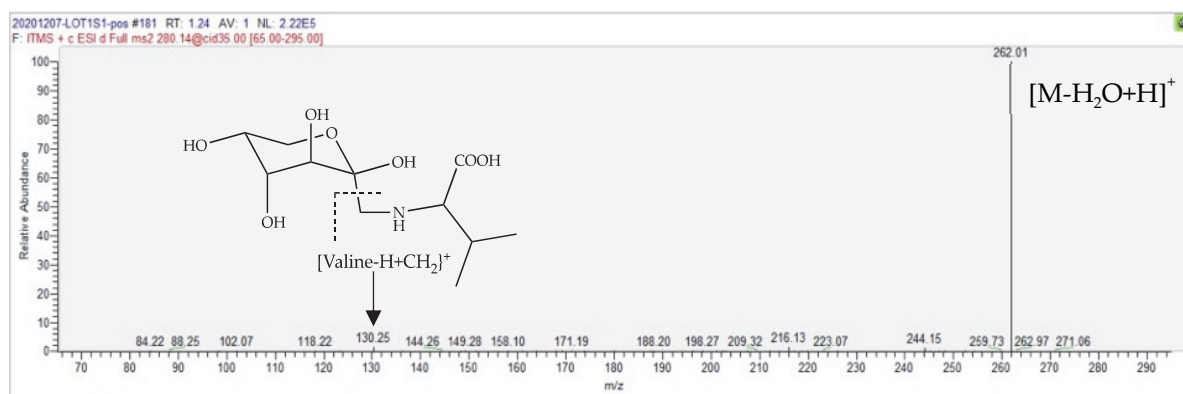

**Figure S7.** MS/MS spectrum of the protonated molecular positive ion of valine fructose conjugate at m/z 280 showing the characteristic  $[Amino\ Acid-H+CH_2]^+$  ion of Amadori rearrangement products.

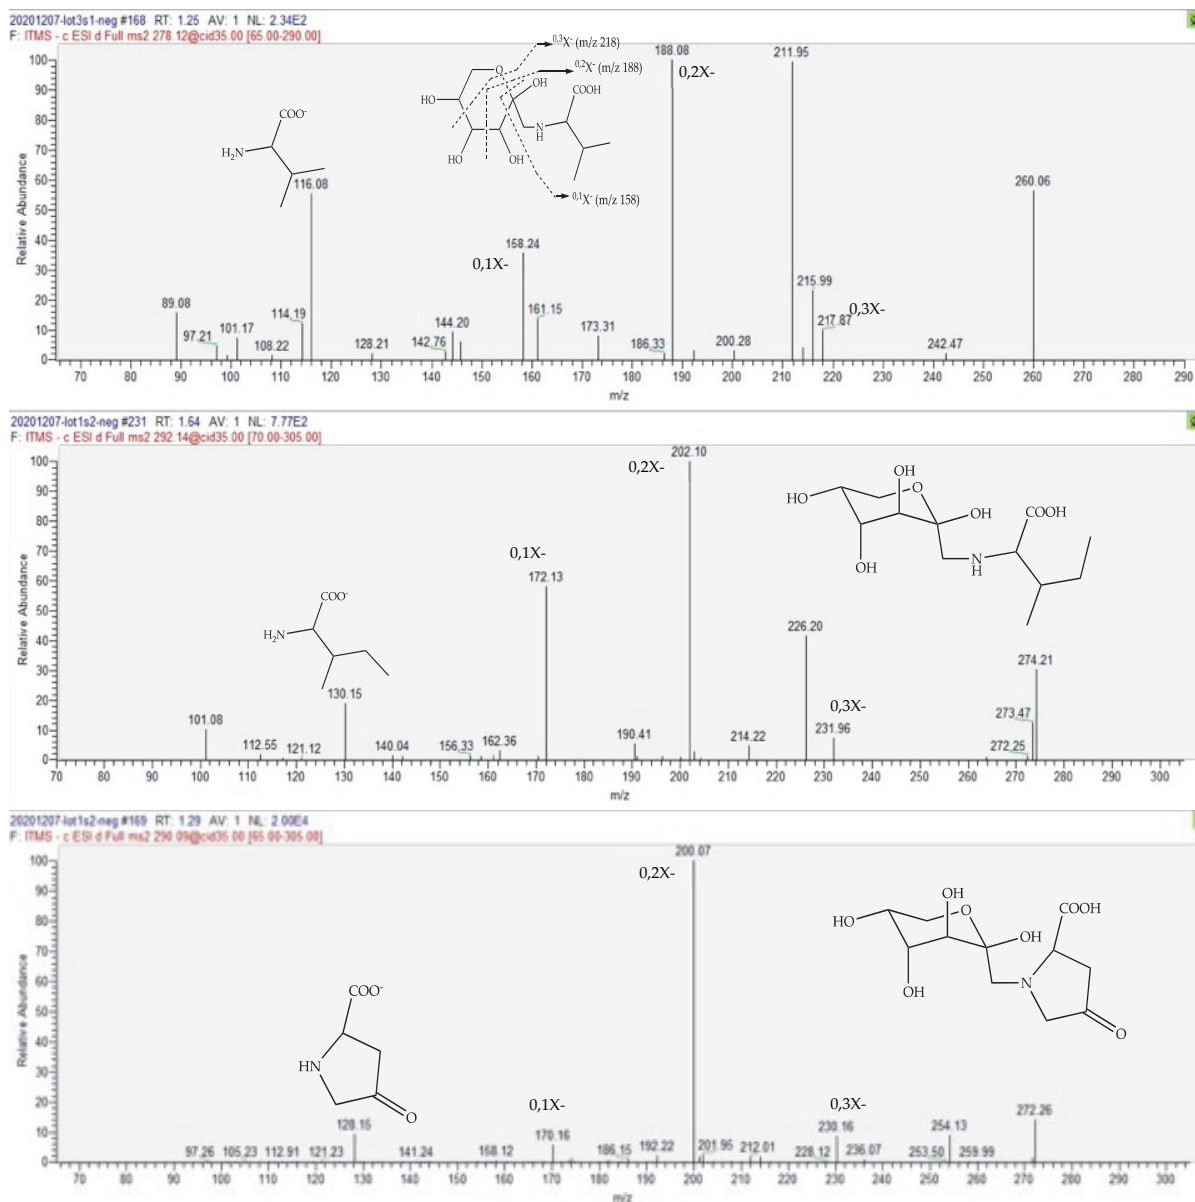

**Figure S8.** From top to bottom, negative ion MS/MS spectra of valine-, (iso)leucine- and oxyproline-fructose with diagnostic ions showing the similarities of fragmentation patterns between the three derivatives.

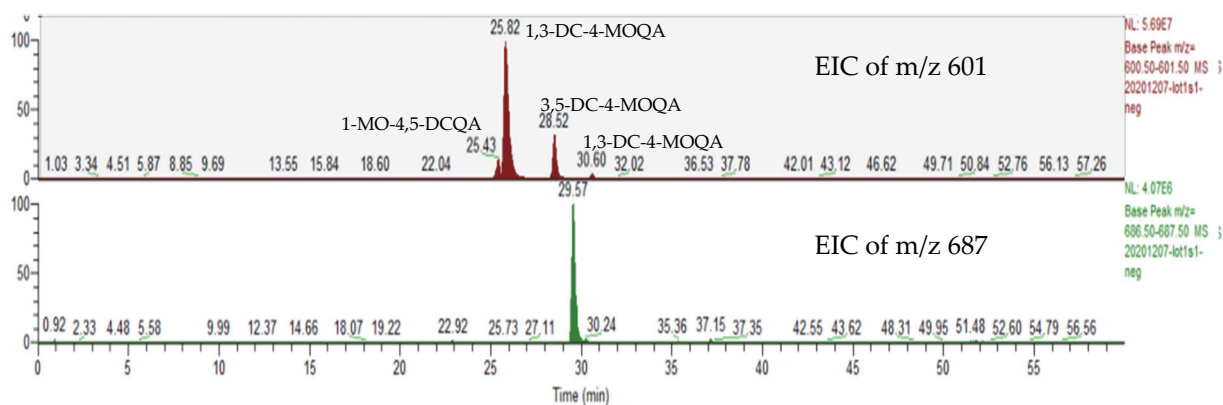

**Figure S9.** Extracted Ion Chromatograms (EIC) of the negative ions  $m/z$  601 and  $m/z$  687.

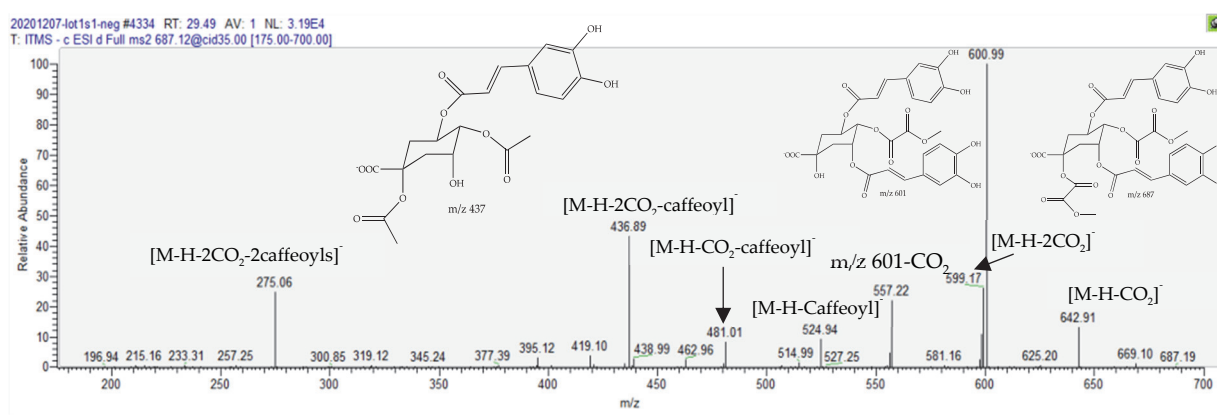

**Figure S10.** MS/MS spectrum of the  $[M-H]^-$  ion at  $m/z$  687 (putative 3,5-dicafeoyl-1,4-dimethoxyoxaloyl-quinic acid) with suggested structures for the main product ions.

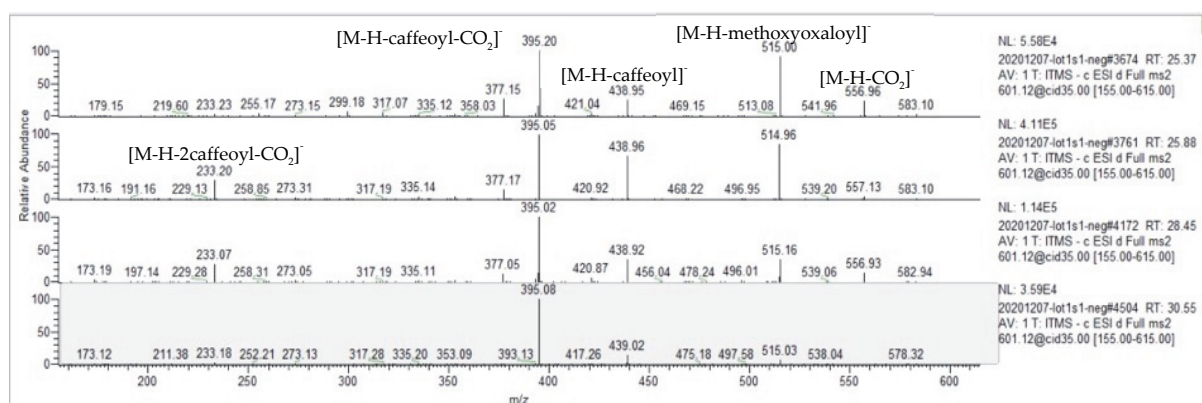

**Figure S11.** MS/MS spectra of the  $[M-H]^-$  ions of the 4 regioisomers at  $m/z$  601. Top to bottom:  $m/z$  601 ions at Rt 25.4, 25.8, 28.5 and 30.6 min corresponding to 1-MO-4,5-DCQA, 1,5-DC-3-MOQA, 3,5-DC-4-MOQA and 1,3-DC-4-MOQA respectively.

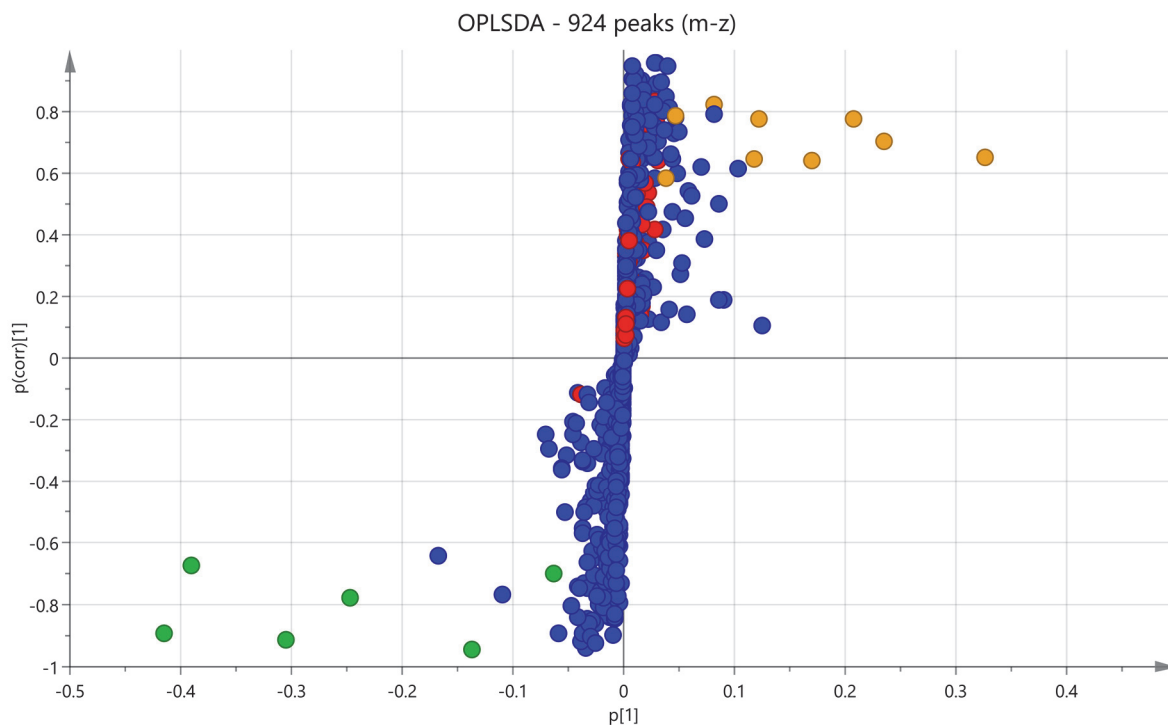

**Figure S12.** Multivariate analysis (OPLS-DA S-Plot) depicting the flavonoids (using MS-Finder annotation) in red and showing that they are more concentrated in dMT when compared to fMT but below the threshold set ( $p > |0.05|$ ).

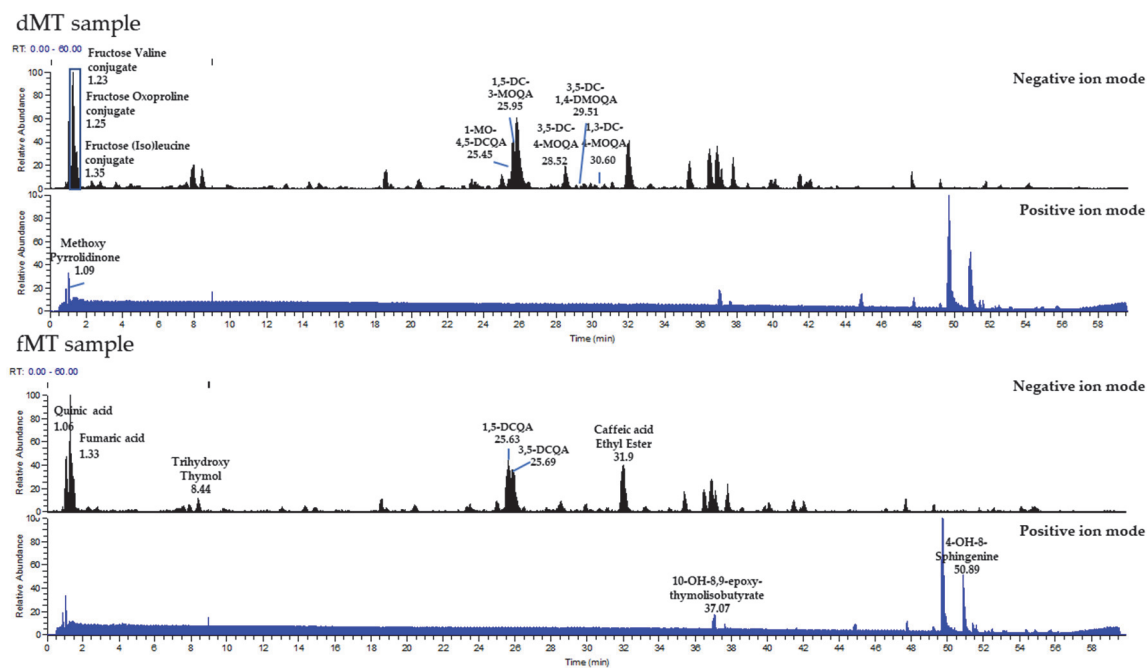

**Figure S13.** Positive and negative ion LC-MS base peak chromatograms of mother tinctures obtained from dried Arnica (dMT) and from fresh whole plant (fMT) showing the discriminant compounds.
